# Supplementary material for: Discovery and genome sequencing of a new virus related to members of the family Tymoviridae, isolated from mosquitoes of the genus Mansonia in Brazil
Source: PubMed Central journal article supplement (PMC9360100; doi:10.1007/s00705-022-05475-x), 2022-06-05
Supplement: 705_2022_5475_MOESM1_ESM.pdf [file 705_2022_5475_MOESM1_ESM.pdf]

**Article title:** Discovery of a new virus of the family *Tymoviridae* isolated from mosquitoes of the genus *Mansonia* in Brazil

**Journal name:** Archives of Virology

**Author names:** Keissy Karoline Pinheiro Miranda<sup>1</sup>, Glendda Juscely Pereira Galvão<sup>1</sup>, Pedro Arthur da Silva Araújo<sup>1</sup>, Ana Claudia da Silva Ribeiro<sup>1</sup>, Sandro Patroca da Silva<sup>1</sup>, Poliana da Silva Lemos<sup>2</sup>, Lívia Carácio Martins<sup>1</sup>, Márcio Roberto Teixeira Nunes<sup>2</sup>, Pedro Fernando da Costa Vasconcelos<sup>6</sup>, Vânia da Costa Ferreira<sup>3</sup>, Fábio Medeiros da Costa<sup>4</sup>, Rosemary Aparecida Roque<sup>5</sup>, Wanderli Pedro Tadei<sup>5</sup>, Ana Cecília Ribeiro Cruz<sup>1\*</sup>, Valéria Lima Carvalho<sup>1</sup>

**Affiliation:**

<sup>1</sup> Department of Arbovirology and Hemorrhagic Fevers, and Graduate Program in Virology, Evandro Chagas Institute, Ananindeua, PA 67030-000, Brazil.

<sup>2</sup> Center for Technological Innovations, Evandro Chagas Institute, Ananindeua, PA 67030-000, Brazil.

<sup>3</sup> Energia Sustentável do Brasil, 76840-000, Porto Velho, Rondônia, Brazil.

<sup>4</sup> Oikos Consultoria e Projetos, 76801-260, Porto Velho, Rondônia, Brazil.

<sup>5</sup> Malaria and Dengue Laboratory, National Institute of Amazonian Research (INPA), 69067-375, Manaus, Amazonas, Brazil.

<sup>6</sup> State University of Pará – Department of Pathology, Belém, PA 66087-670, Brazil

**E-mail address of the corresponding author:** [anacecilia@iec.gov.br](mailto:anacecilia@iec.gov.br)

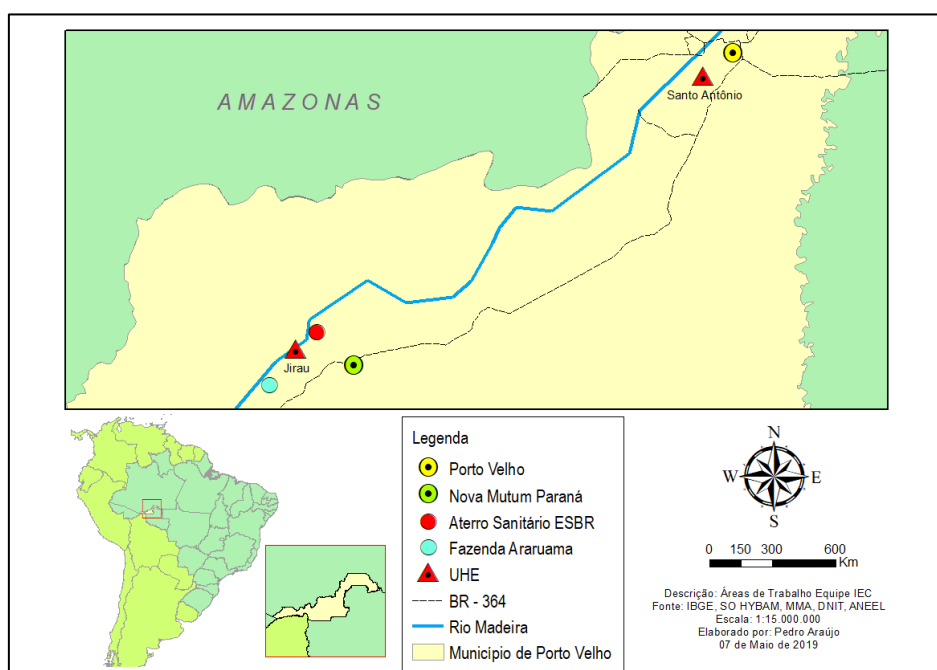

**Online Resource 1** - Cartographic representation of the study areas in Nova Mutum Paraná, Rondônia State, Brazil.
